# Supplementary material for: Near-infrared emitting iridium(iii) complexes for mitochondrial imaging in living cells
Source: Royal Society of Chemistry journal article supplement (doi:10.1039/c7dt00255f), 2017-01-01
Supplement: c7dt00255f1.pdf [file c7dt00255f1.pdf]

## Supporting Information

### Near-infrared emitting iridium(III) complexes for mitochondrial imaging in living cells

Yuying Liu,<sup>a</sup> Peipei Zhang,<sup>a</sup> Xiaoqiang Fang,<sup>a</sup> Gongqing Wu,<sup>a</sup> Shuting Chen,<sup>a</sup> Zhina Zhang,<sup>a</sup> Hui Chao,<sup>\*c</sup> Wenying Tan,<sup>b</sup> and Li Xu<sup>\*a</sup>

*a:* School of Chemistry and Chemical Engineering, Guangdong Pharmaceutical University, Zhongshan 528458, P. R. China

*b:* School of Food Science, Guangdong Pharmaceutical University, Zhongshan 528458, P. R. China

*c:* MOE Key Laboratory of Bioinorganic and Synthetic Chemistry, School of Chemistry and Chemical Engineering, Sun Yat-Sen University, Guangzhou, 510275, P. R. China

\* E-mail: [xuli473@163.com](mailto:xuli473@163.com); Fax: 86-760-88207266; Tel: 86-760-88207266

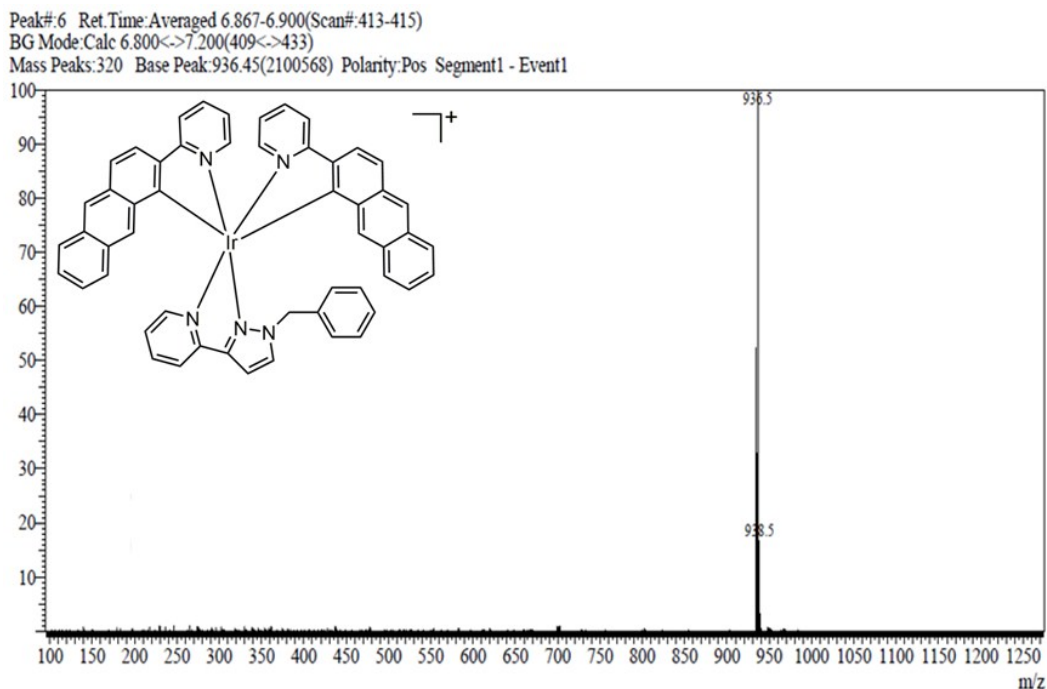

Fig. S1 ESI-MS spectrum of Ir1

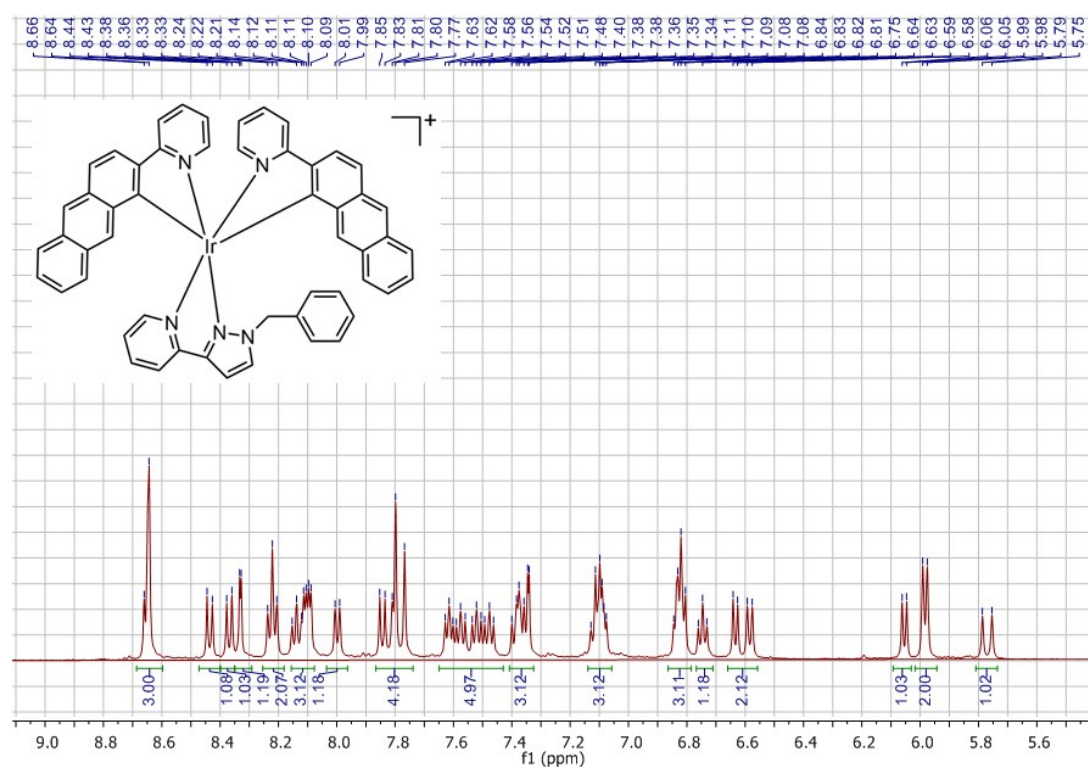

**Fig. S2** <sup>1</sup>H NMR spectrum of Ir1

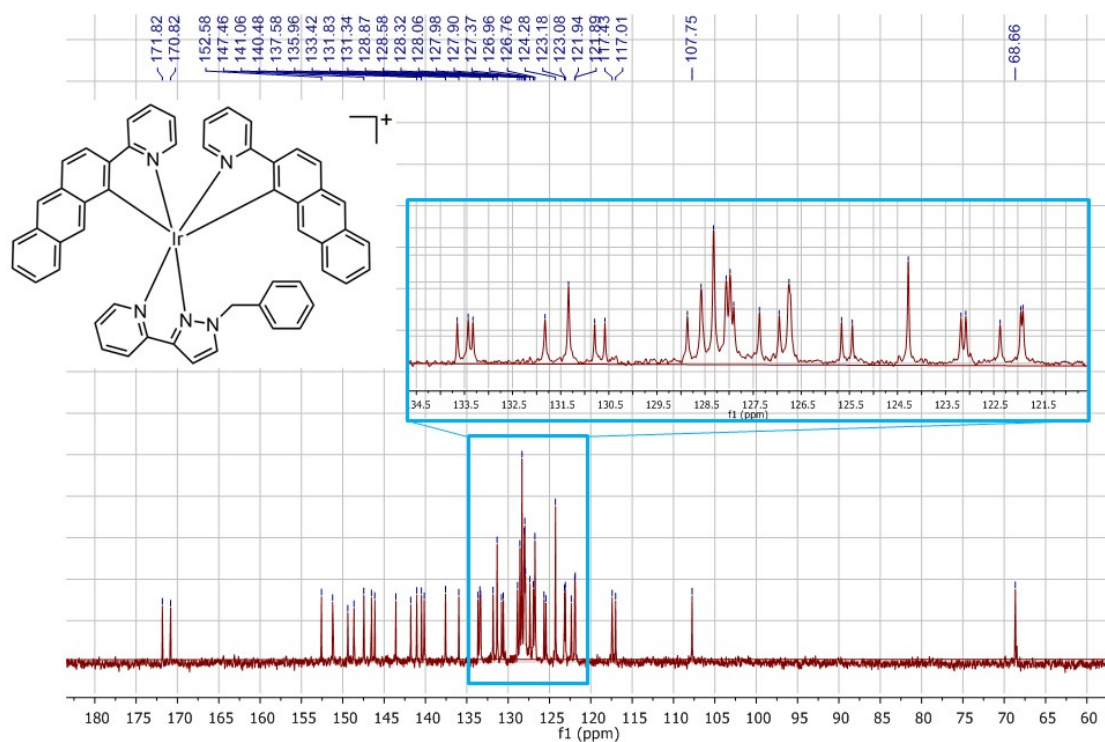

**Fig. S3** <sup>13</sup>C NMR spectrum of Ir1

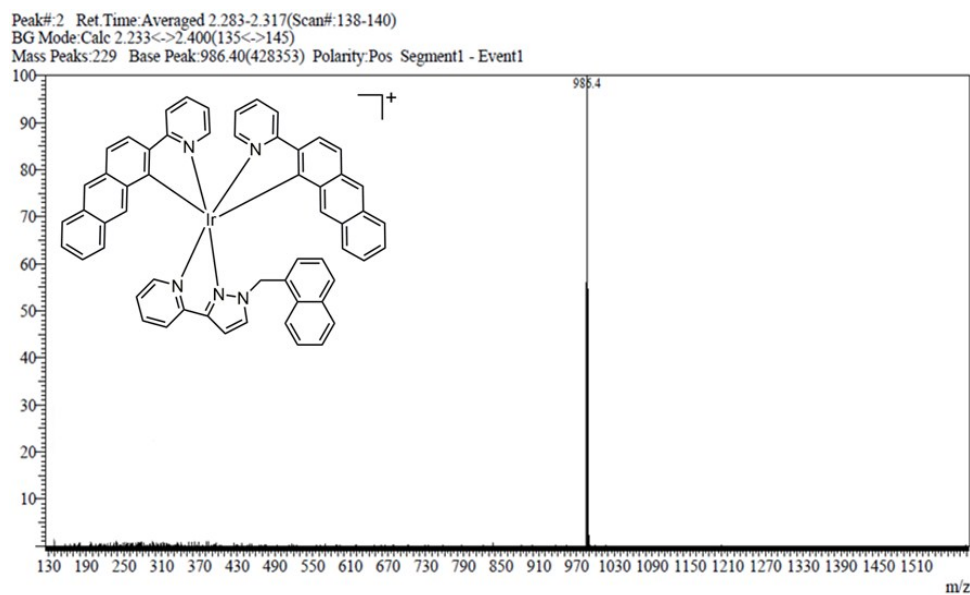

Fig. S4 ESI-MS spectrum of Ir2

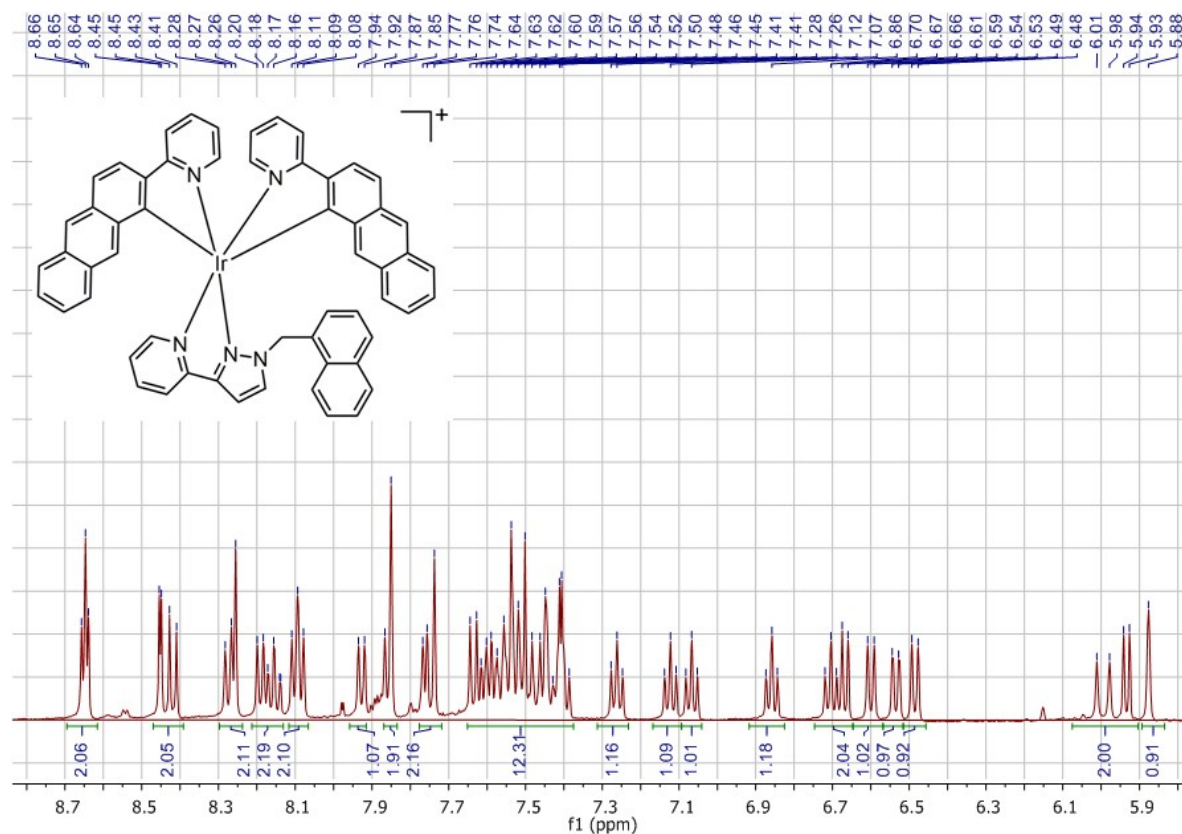

Fig. S5  $^1\text{H}$  NMR spectrum of Ir2

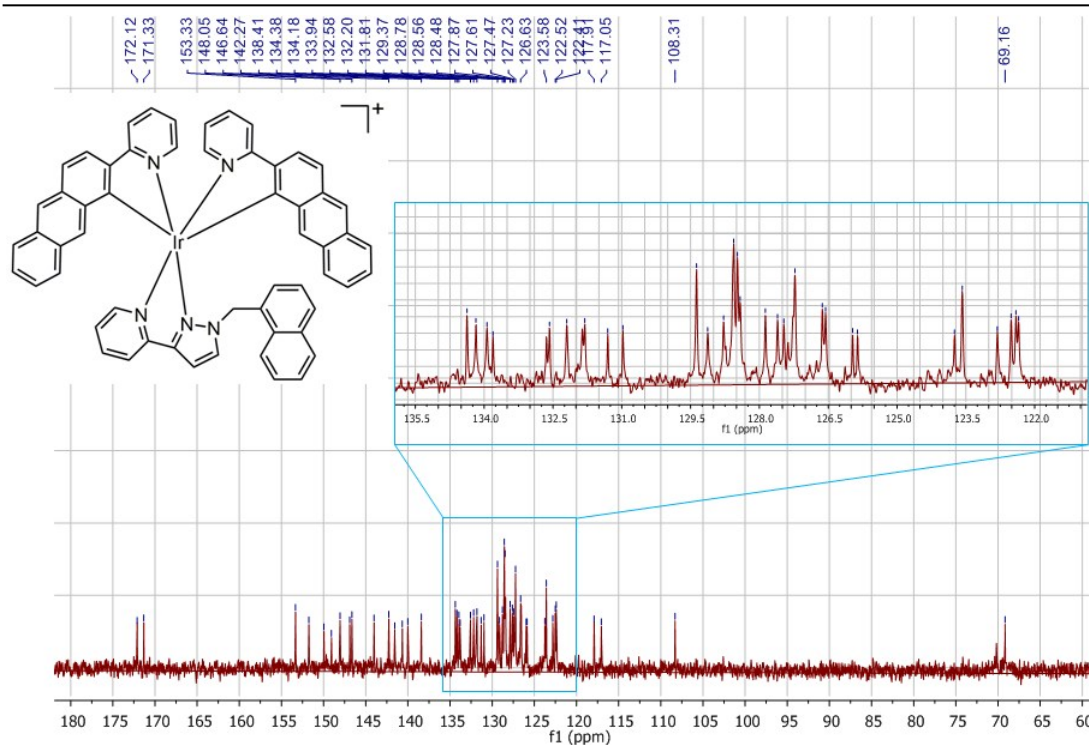

**Fig. S6**  $^{13}\text{C}$  NMR spectrum of **Ir2**

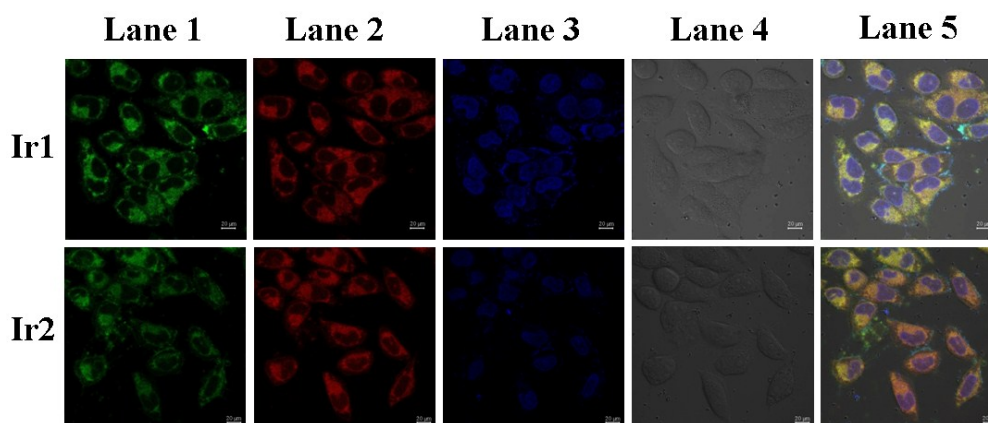

**Fig. S7** Confocal phosphorescence images, bright field images and their overlay of living HeLa cells incubated with 20  $\mu\text{M}$  of **Ir1–Ir2** in PBS (pH = 7.4) for 1 h at 37  $^{\circ}\text{C}$ , followed by 50 nM of MTG and 2  $\mu\text{g/mL}$  of DAPI, respectively. lane 1, confocal phosphorescence images of MTG; lane 2, confocal phosphorescence images of **Ir1–Ir2**; lane 3, confocal phosphorescence images of DAPI; lane 4, bright field images; lane 5, overlay of lane 1, lane 2, lane 3, lane 4 and lane 5.

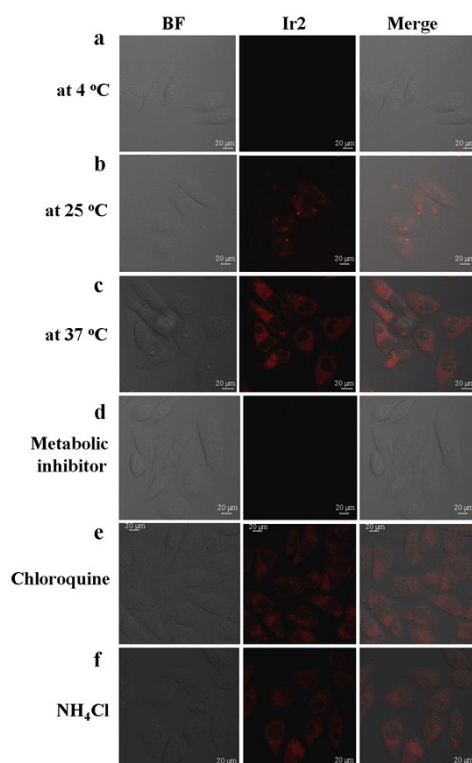

**Fig. S8** Confocal phosphorescence images and bright-field images of living HeLa cells incubated with 20 μM **Ir2** in PBS (pH = 7.4) under different conditions. (a) The cells were incubated with 20 μM of **Ir2** at 4 °C for 1 h. (b) The cells were incubated with 20 μM of **Ir2** at 25 °C for 1 h. (c) The cells were incubated with 20 μM of **Ir2** at 37 °C for 1 h. (d) The cells were preincubated with 50 mM 2-deoxy-D-glucose and 5 μM oligomycin in PBS for 1 h at 37 °C and then incubated with 20 μM of **Ir2** at 37 °C for 1 h. (e and f ) The cells were pretreated with endocytic inhibitors chloroquine (100 μM) and NH<sub>4</sub>Cl (50 mM), respectively, and then incubated with 20 μM of **Ir2** at 37 °C for 1 h.

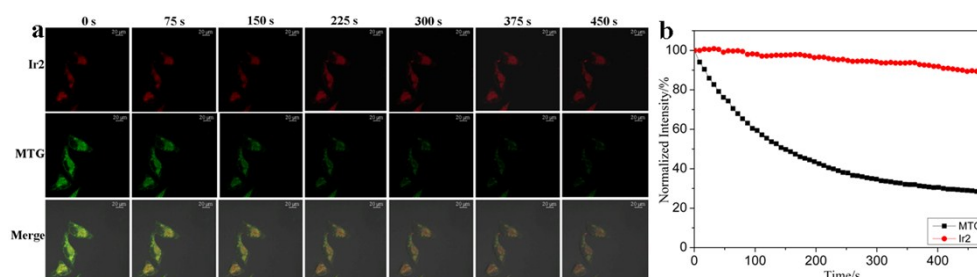

**Fig. S9** The anti-bleaching properties of **Ir2**. HeLa cells were treated with 20 μM of **Ir2**, followed by 50 nM of MTG. (a) Confocal phosphorescence images of cells stained with **Ir2** and MTG with an increasing bleaching time (450 s). (b) Intensity loss (%) of the phosphorescence of

Ir2 and MTG with an increasing bleaching time.

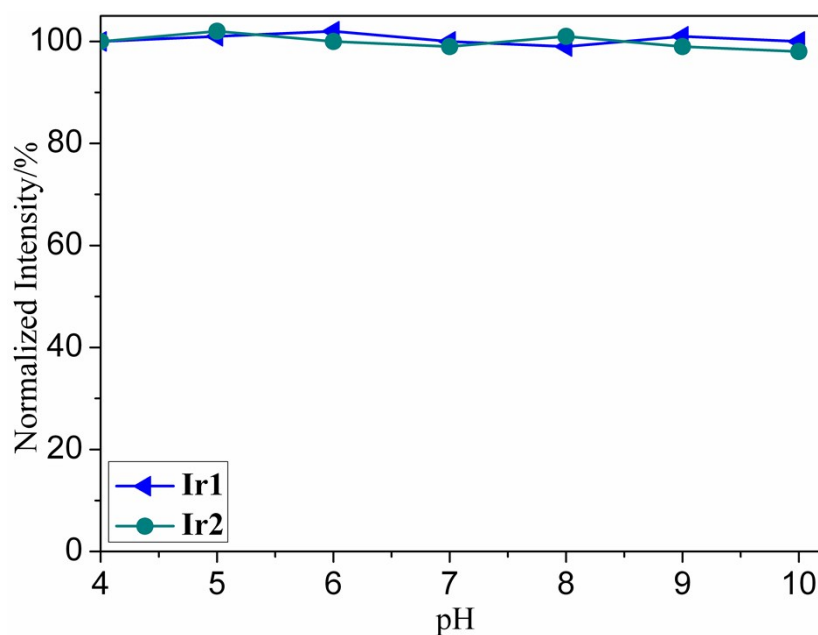

**Fig. S10** The emission intensity of 10  $\mu$ M of **Ir1–Ir2** at 751 and 750 nm, respectively, under different pH in Britton-Robinson buffer.

**Table S1** Crystal data and structure refinement for **Ir1**

|                                       |                                       |
|---------------------------------------|---------------------------------------|
| Identification code                   | <b>Ir1</b>                            |
| Empirical formula                     | $C_{53}H_{37}ClN_5Ir$                 |
| Formula weight                        | 971.52                                |
| Temperature/K                         | 150(2)                                |
| Crystal system                        | Monoclinic                            |
| Space group                           | C1 2/c 1                              |
| $a/\text{\AA}$                        | 33.9838(13)                           |
| $b/\text{\AA}$                        | 13.9225(6)                            |
| $c/\text{\AA}$                        | 24.0406(11)                           |
| $\alpha/^\circ$                       | 90                                    |
| $\beta/^\circ$                        | 129.3560(10)                          |
| $\gamma/^\circ$                       | 90                                    |
| Volume/ $\text{\AA}^3$                | 8795.0(7)                             |
| $Z$                                   | 8                                     |
| $\rho_{\text{calc}}/\text{g cm}^{-3}$ | 1.467                                 |
| $\mu/\text{mm}^{-1}$                  | 3.139                                 |
| $F(000)$                              | 3872                                  |
| Crystal size/ $\text{mm}^3$           | $0.31 \times 0.25 \times 0.14$        |
| Radiation                             | Mo-K $\alpha$ ( $\lambda = 0.71073$ ) |



|                                                 |                                                                    |
|-------------------------------------------------|--------------------------------------------------------------------|
| $2\theta$ range for data collection/ $^{\circ}$ | 4.48 to 52.74                                                      |
| Index ranges                                    | $-42 \leq h \leq 42$ , $-17 \leq k \leq 17$ , $-30 \leq l \leq 30$ |
| Reflections collected                           | 8952                                                               |
| Independent reflections                         | 7593 [ $R_{\text{int}} = 0.0344$ , $R_{\text{unet}} = 0.0270$ ]    |
| Data/restraints/parameters                      | 8952/1/541                                                         |
| Goodness-of-fit on $F^2$                        | 1.105                                                              |
| Final $R$ indexes [ $I \geq 2\sigma(I)$ ]       | $R_1 = 0.0340$ , $wR_2 = 0.0980$                                   |
| Final $R$ indexes [all data]                    | $R_1 = 0.0413$ , $wR_2 = 0.1013$                                   |

**Table S2** Selected bond lengths (Å) and angles ( $^{\circ}$ ) for **Ir1**

|            |          |             |          |            |          |
|------------|----------|-------------|----------|------------|----------|
| Ir1-N1     | 2.012(4) | N1-Ir1-N3   | 174.1(1) | C30-Ir1-N4 | 102.2(1) |
| Ir1-C11    | 2.115(3) | N1-Ir1-C30  | 92.7(2)  | N2-Ir1-N1  | 87.7(2)  |
| Ir1-N3     | 2.201(4) | N1-Ir1-N4   | 103.4(2) | N2-Ir1-C11 | 91.8(2)  |
| Ir1-C30    | 2.099(3) | C11-Ir1-N3  | 106(1)   | N2-Ir1-N3  | 94.8(2)  |
| Ir1-N2     | 1.995(4) | C11-Ir1-N4  | 87.7(1)  | N2-Ir1-C30 | 79.6(2)  |
| Ir1-N4     | 2.188(3) | C30-Ir1-C11 | 168.5(1) | N2-Ir1-N4  | 168.6(2) |
| N1-Ir1-C11 | 79.2(2)  | C30-Ir1-N3  | 82.6(1)  | N4-Ir1-N3  | 74.4(1)  |

**Table S3** Absorption and photoluminescence data of **Ir1-Ir2**.

| Complex    | $\lambda_{\text{abs}}$<br>/nm |     |     |     |     | $\lambda_{\text{PL}}$<br>/nm | $\tau/\text{ns}$ | $\Phi_{\text{PL}}$ |
|------------|-------------------------------|-----|-----|-----|-----|------------------------------|------------------|--------------------|
| <b>Ir1</b> | 225                           | 316 | 386 | 440 | 500 | 751                          | 442              | 0.62               |
| <b>Ir2</b> | 225                           | 316 | 386 | 440 | 500 | 750                          | 456              | 0.85               |
